# Supplementary material for: Hypermethylation of the Micro-RNA 145 Promoter Is the Key Regulator for NLRP3 Inflammasome-Induced Activation and Plaque Formation
Source: PubMed Central journal article supplement — JACC Basic Transl Sci. 2018 Sep 19;3(5):604–24. doi: 10.1016/j.jacbts.2018.06.004 (PMC6234615; doi:10.1016/j.jacbts.2018.06.004), 2018-09-19
Supplement: mmc1.pdf [file mmc1.pdf]

Figure I

```
M327  
TAGTGAATAGCCATTGTATATGGTTCTGCGTTGAAACCCCTTCGTCTCTGTAAATCAGACAGTCCTTAACA  
ATCCTTAGCCCCAGTAGAGGCTCAGGATCCCGGCAACCCAACGATACGACACTGTCACGTTGCAACCAC  
GAAATGCCAGACATTAGGCCTGAGGTCACAGTCT  
M282-F: 5' TAGTGAATAGTTATTGTATATGGTTTGG 3'  
M282-R: 5' AAACATAACCTCAAACCTAATATCTAA 3' product length=174
```

**Supplemental Figure I. The sequence of CpG island in miR-145 promoter.**

The CG in red represents the 7 CpG sites in the promoter and named +29, +43 +102, +113, +118, +129 and +140 respectively. The primers were used for BSP and ChIP assay in this article.

Figure II

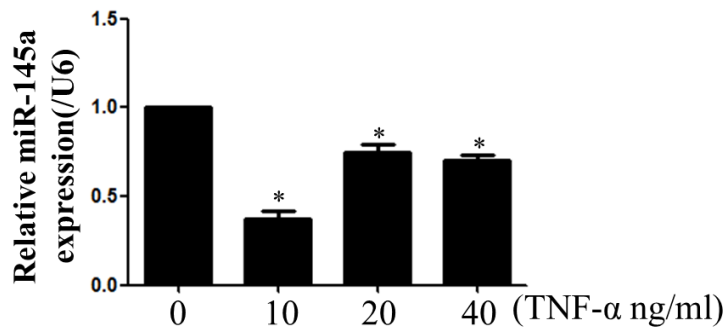

**Supplemental Figure II. TNF-α (10ng/ml) significantly depressed miR-145 expression in VSMCs.**

Different concentrations of TNF-α (0, 10, 20, 40ng/ml) were used to stimulate VSMCs for 24h. The level of miR-145 was determined by quantitative PCR.

Figure III

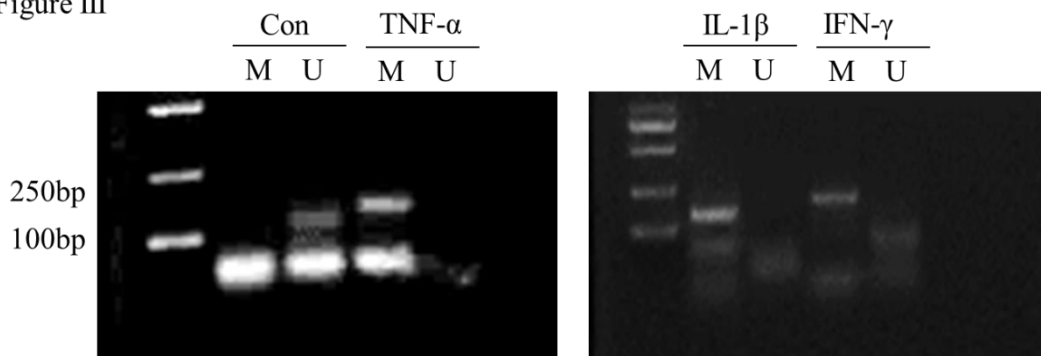

**Supplemental Figure III. Methylation status of +129 site in miR-145 promoter.**

TNF-α, IL-1β and IFN-γ were used to treat VSMCs for 24h respectively. MSP was performed to observe the methylation status of +129 CpG site under different inflammation cytokines.

Figure IV

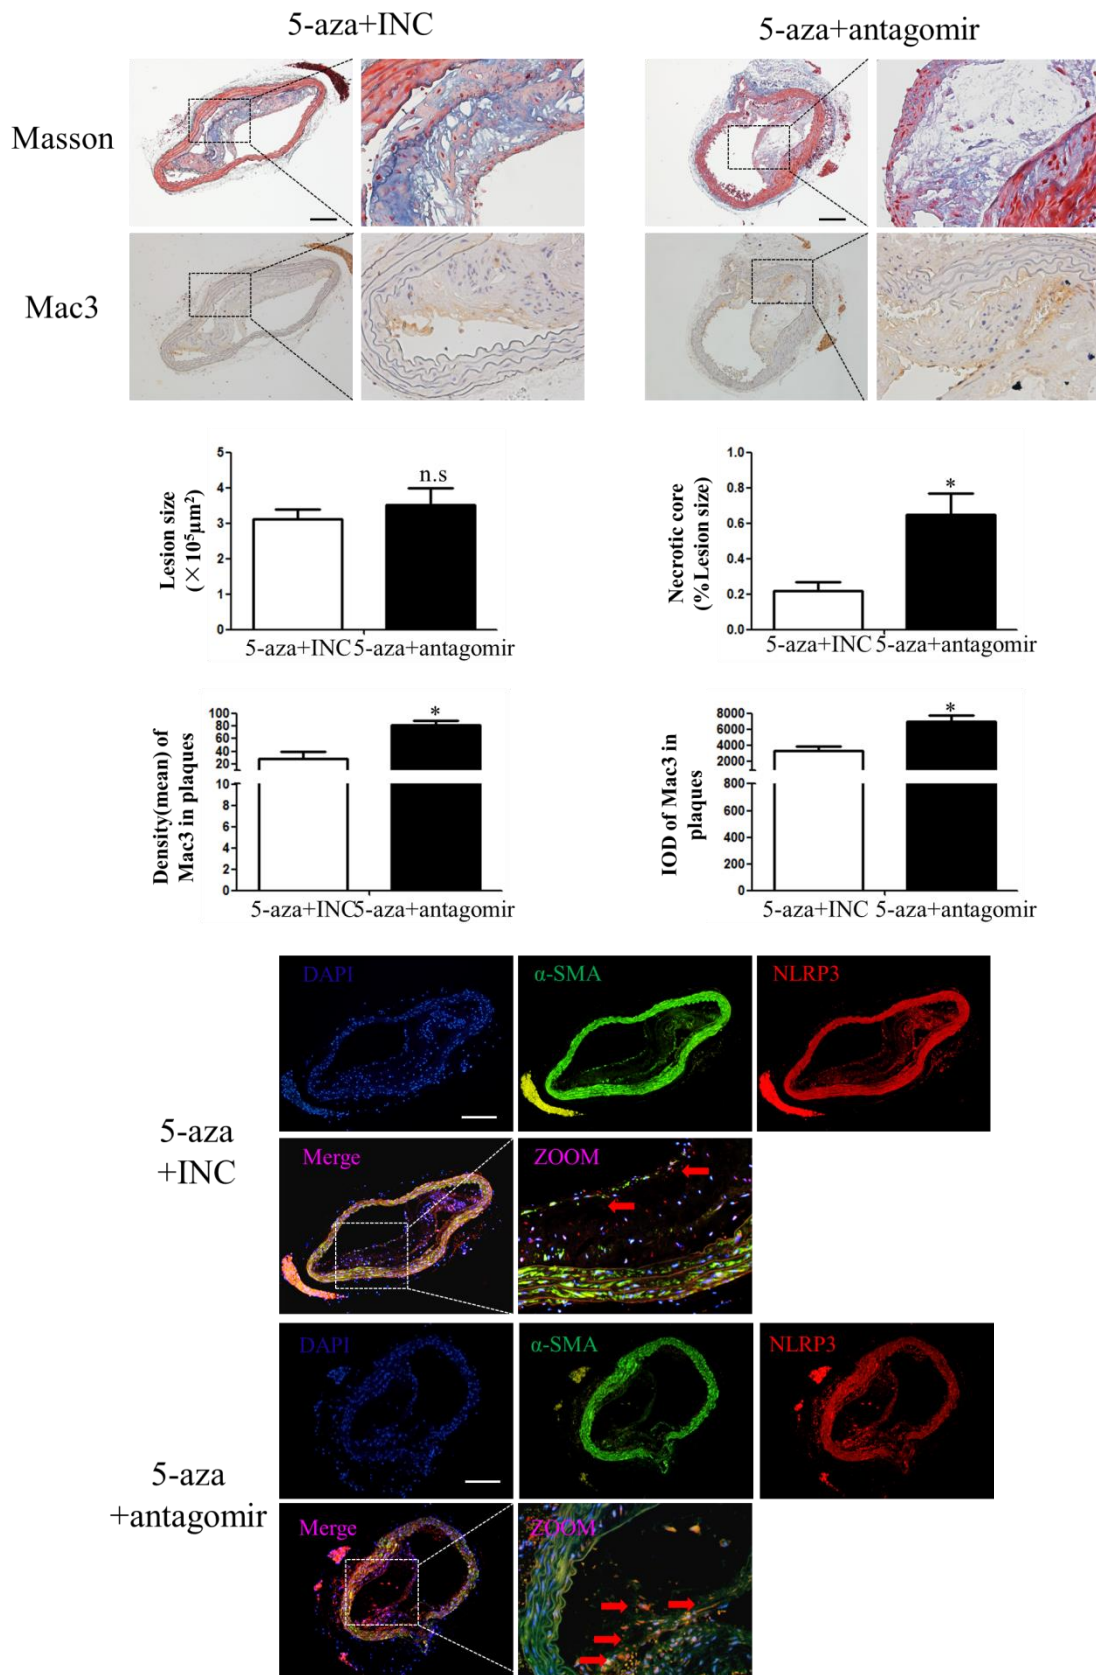

Supplemental Figure IV. miR-145 antagomir eliminated the benefits caused by 5-aza in ApoE<sup>-/-</sup> mice.

ApoE<sup>-/-</sup> mice fed with western diet for 16 weeks and then treated with 5-aza together with miR-145 antagomir (50mg/kg tail vein injection) every 3 days for another 6 weeks. The NLRP3 expression is significantly increased in VSMC in miR-145 antagomir+5-aza group compared with INC+5aza group, accompany by increased inflammation infiltration and necrotic core size in plaques, but the plaque size alters slightly. Values are mean±SEM from 6 animals in each group, \*P<0.05 vs control group.

Figure V

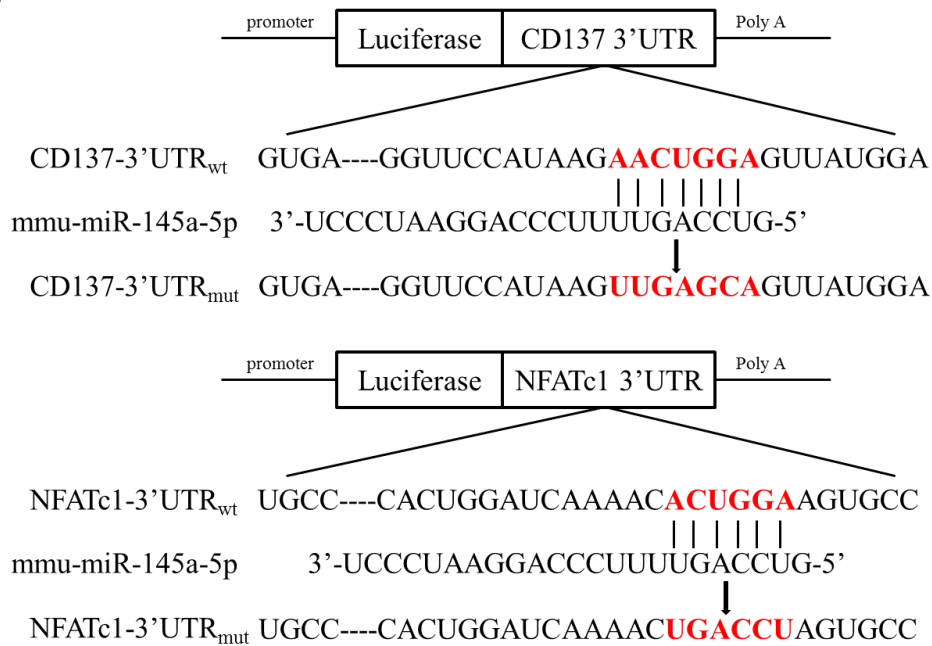

**Supplemental Figure V. The target seed regions of miR-145 in luciferase assay.**

The 3'UTR comprised of seed region was cloned into psicheck2 plasmid. The sequence in red was the normal seed region and mutated seed region respectively.

| PCR Product | Application | Forward Primer                         | Reverse primer                               |
|-------------|-------------|----------------------------------------|----------------------------------------------|
| CD137       | RT-PCR      | AGAGGGAGGACCAGCA<br>TTTA               | CAGGATGGTGGGGTCCTAGT                         |
| NFATc1      | RT-PCR      | CACACACCCCGCATGTC<br>A                 | AGCTGGTACTTGGCATCCAC                         |
| Sh-NFATc1   | Knock-d     | CCGGGGTCAGTGTGACC<br>GAAGATACCTCGAGGTA | AATTCAAAAAGGTCAGTGTG<br>ACCGAAGATACCTCGAGGTA |

|                     |                    |                                     |                                        |
|---------------------|--------------------|-------------------------------------|----------------------------------------|
|                     | own                | TCTTCGGTCACACTGAC<br>CTTTTTG        | TCTTCGGTCACACTGACC                     |
| Plenti-Tet2         | Overexp<br>ression | CCGGAATTCATGCCAAA<br>TGGCAGTACAGTGG | TGCTCTAGATCATACAAATG<br>TGTTGTAAGGCCCT |
| miR-145a            | RT-PCR             | GTCCAGTTTTCCCAGGA<br>ATCCCT         | AACGCTTCACGAATTTGCGT                   |
| U6                  | RT-PCR             | CTCGCTTCGGCAGCACA                   | AACGCTTCACGAATTTGCGT                   |
| miR-145<br>promoter | ChIP,B<br>SP       | TAGTGAATAGCCATTGT<br>ATATGGTTCTG    | AAACTATAACCTCAAACCTA<br>ATATCTAA       |

**Supplemental Table1. The related primers used in articles.**
